# Supplementary material for: Co‐morbidities and co‐medications as confounders of cardioprotection—Does it matter in the clinical setting?
Source: PubMed Central journal article supplement (PMC7680006; doi:10.1111/bph.14839), 2020-01-03
Supplement: BPH-177-5252-s001.pdf [file BPH-177-5252-s001.pdf]

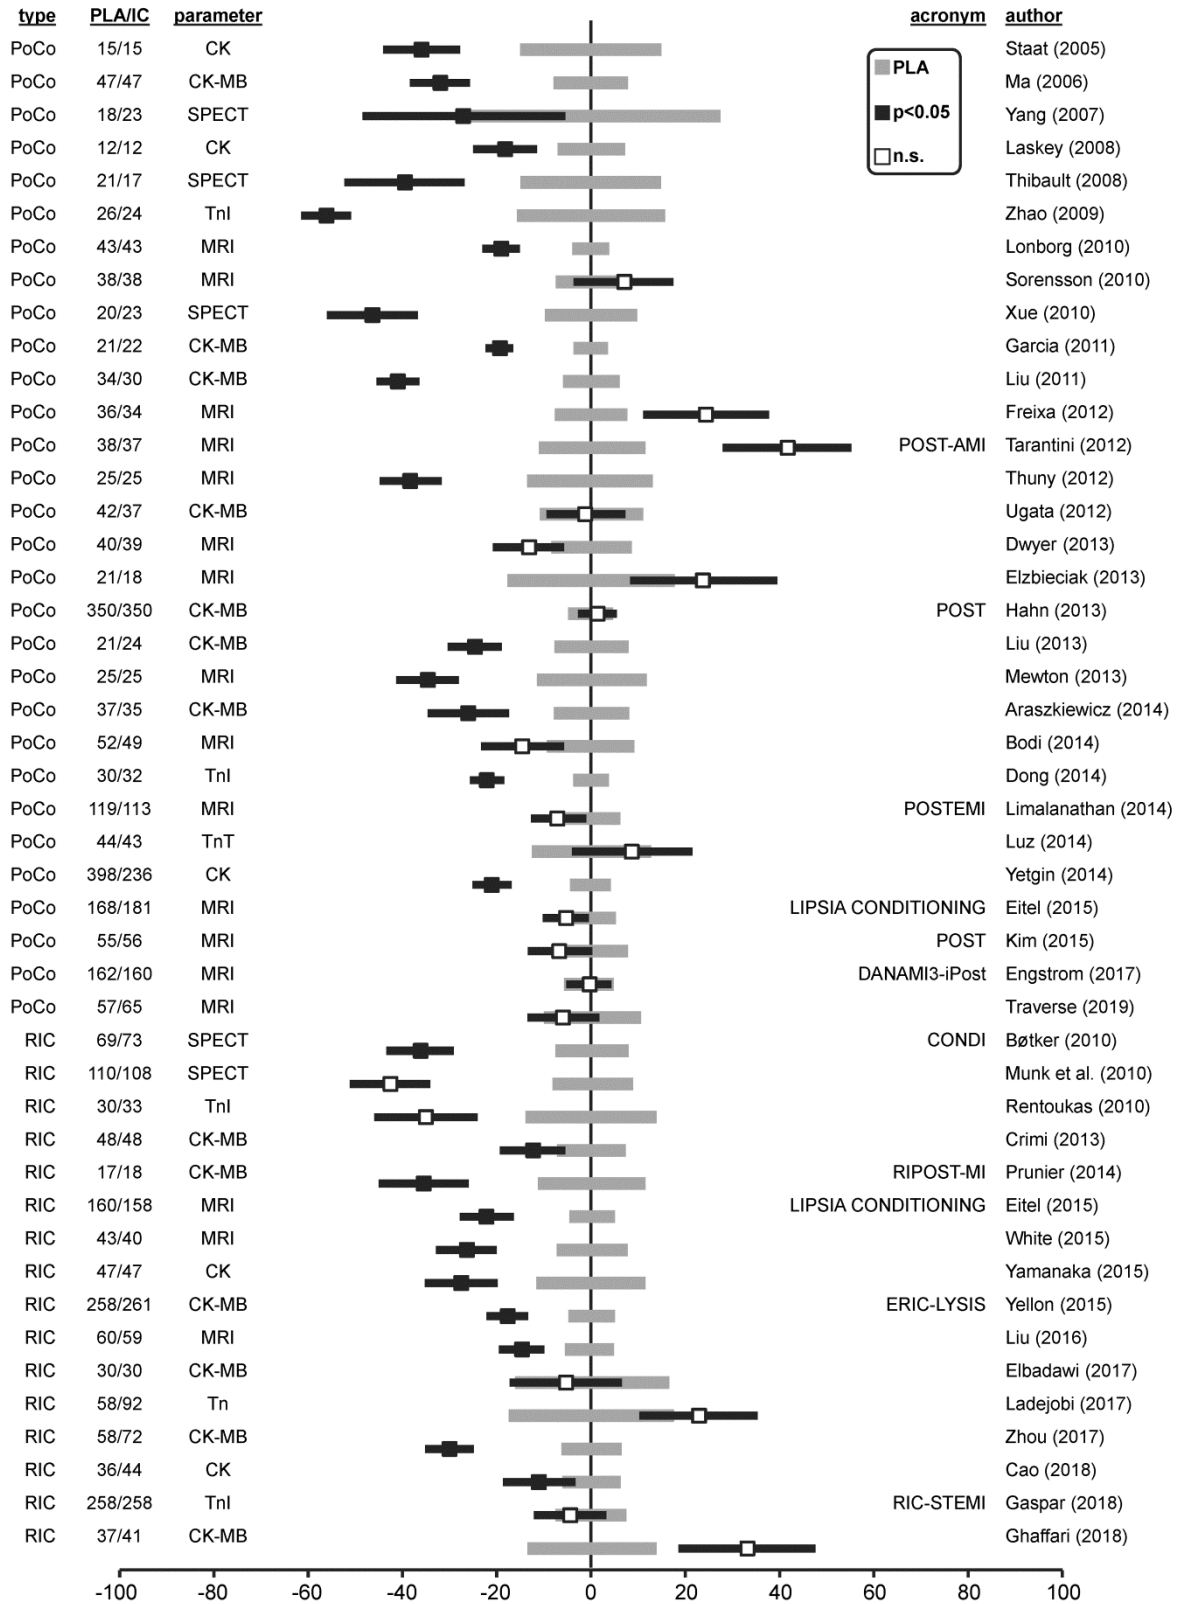

**Supplemental Figure 1:** Forest plot of clinical studies on ischaemic conditioning in patients with acute myocardial infarction and with biomarker release or imaging techniques to estimate infarct size as end-point. The zero represents the mean value, and the gray bars represent the standard error of the mean for the placebo group. Closed squares represent

significantly reduced infarct size ( $\bar{x} \pm \text{SEM}$ ), open squares represent non-significant changes. CK(-MB) = creatine kinase (muscle-brain); IC = ischaemic conditioning group; MRI = magnetic resonance imaging; n.s. = not significant; PLA = placebo group; PoCo = local ischaemic postconditioning; RIC = remote ischaemic conditioning; SPECT = single-photon emission computed tomography; Tn(I) = troponin (I);

## References

Araszkievicz, A., Grygier, M., Pyda, M., Rajewska, J., Michalak, M., Lesiak, M., et al. (2014). Postconditioning reduces enzymatic infarct size and improves microvascular reperfusion in patients with ST-segment elevation myocardial infarction. *Cardiology*, 129, 250-257. <https://doi.org/10.1159/000367965>

Bodi, V., Ruiz-Nodar, J.M., Feliu, E., Minana, G., Nunez, J., Husser, O., et al. (2014). Effect of ischemic postconditioning on microvascular obstruction in reperfused myocardial infarction. Results of a randomized study in patients and of an experimental model in swine. *International Journal of Cardiology*, 175, 138-146. <https://doi.org/10.1016/j.ijcard.2014.05.003>

Bøtker, H.E., Kharbanda, R., Schmidt, M.R., Bottcher, M., Kalltoft, A.K., Terkelsen, C.J., et al. (2010). Remote ischaemic conditioning before hospital admission, as a complement to angioplasty, and effect on myocardial salvage in patients with acute myocardial infarction: a randomised trial. *The Lancet*, 375, 727-734. [https://doi.org/10.1016/S0140-6736\(09\)62001-8](https://doi.org/10.1016/S0140-6736(09)62001-8)

Cao, B., Zhang, C., Wang, H., Xia, M., & Yang, X. (2018). Renoprotective effect of remote ischemic postconditioning in patients with ST-elevation myocardial infarction undergoing primary percutaneous coronary intervention. *Therapeutics and Clinical Risk Management*, 14, 369-375. <https://doi.org/10.2147/TCRM.S158768>

Crimi, G., Pica, S., Raineri, C., Bramucci, E., De Ferrari, G.M., Klersy, C., et al. (2013). Remote ischemic post-conditioning of the lower limb during primary percutaneous coronary intervention safely reduces enzymatic infarct size in anterior myocardial infarction: a randomized controlled trial. *Journal of the American College of Cardiology Cardiovascular Intervention*, 6, 1055-1063. <https://doi.org/10.1016/j.jcin.2013.05.011>

Dong, M., Mu, N., Guo, F., Zhang, C., Ren, F., Li, J., et al. (2014). The beneficial effects of postconditioning on no-reflow phenomenon after percutaneous coronary intervention in

patients with ST-elevation acute myocardial infarction. *Journal of Thrombosis and Thrombolysis*, 38, 208-214. <https://doi.org/10.1007/s11239-013-1010-0>

Dwyer, N.B., Mikami, Y., Hilland, D., Aljizeeri, A., Friedrich, M.G., Traboulsi, M., et al. (2013). No cardioprotective benefit of ischemic postconditioning in patients with ST-segment elevation myocardial infarction. *Journal of Interventional Cardiology*, 26, 482-490. <https://doi.org/10.1111/joic.12064>

Eitel, I., Stiermaier, T., Rommel, K.P., Fuernau, G., Sandri, M., Mangner, N., et al. (2015). Cardioprotection by combined intrahospital remote ischaemic preconditioning and postconditioning in ST-elevation myocardial infarction: the randomized LIPSIA CONDITIONING trial. *European Heart Journal*, 36, 3049-3057. <https://doi.org/10.1093/eurheartj/ehv463>

Elbadawi, A., Awad, O., Raymond, R., Badran, H., Mostafa, A.E., & Saad, M. (2017). Impact of remote ischemic postconditioning during primary percutaneous coronary intervention on left ventricular remodeling after anterior wall ST-segment elevation myocardial infarction: A single-center experience. *The International Journal of Angiology*, 26, 241-248. <https://doi.org/10.1055/s-0037-1601870>

Elzbieciak, M., Wita, K., Grabka, M., Chmurawa, J., Doruchowska, A., Turski, M., et al. (2013). Effect of postconditioning on infarction size, adverse left ventricular remodeling, and improvement in left ventricular systolic function in patients with first anterior STsegment elevation myocardial infarction. *Polish Archives of Internal Medicine*, 123, 268-276. <https://doi.org/10.20452/pamw.1766>

Engstrøm, T., Kelbaek, H., Helqvist, S., Hofsten, D.E., Klovgaard, L., Clemmensen, P., et al. (2017). Effect of ischemic postconditioning during primary percutaneous coronary intervention for patients with ST-segment elevation myocardial infarction: A Randomized Clinical Trial. *The Journal of the American Medical Association Cardiology*, 2, 490-497. <https://doi.org/10.1001/jamacardio.2017.0022>

Freixa, X., Bellera, N., Ortiz-Perez, J.T., Jimenez, M., Pare, C., Bosch, X., et al. (2012). Ischaemic postconditioning revisited: lack of effects on infarct size following primary percutaneous coronary intervention. *European Heart Journal*, 33, 103-112. <https://doi.org/10.1093/eurheartj/ehr297>

Garcia, S., Henry, T.D., Wang, Y.L., Chavez, I.J., Pedersen, W.R., Lesser, J.R., et al. (2011). Long-term follow-up of patients undergoing postconditioning during ST-elevation myocardial

infarction. *Journal of Cardiovascular Translational Research* 4, 92-98. <https://doi.org/10.1007/s12265-010-9252-0>

Gaspar, A., Lourenco, A.P., Pereira, M.A., Azevedo, P., Roncon-Albuquerque, R., Jr., Marques, J., et al. (2018). Randomized controlled trial of remote ischaemic conditioning in ST-elevation myocardial infarction as adjuvant to primary angioplasty (RIC-STEMI). *Basic Research in Cardiology*, 113, 14. <https://doi.org/10.1007/s00395-018-0672-3>

Ghaffari, S., Pourafkari, L., Manzouri, S., & Nader, N.D. (2018). Effect of remote ischemic postconditioning during thrombolysis in STEMI. *Herz*, 43, 161-168. <https://doi.org/10.1007/s00059-017-4550-9>

Hahn, J.Y., Song, Y.B., Kim, E.K., Yu, C.W., Bae, J.W., Chung, W.Y., et al. (2013). Ischemic postconditioning during primary percutaneous coronary intervention: The POST Randomized Trial. *Circulation*, 128, 1889-1896. <https://doi.org/10.1161/CIRCULATIONAHA.113.001690>.

Kim, E.K., Hahn, J.Y., Song, Y.B., Lee, S.C., Choi, J.H., Choi, S.H., et al. (2015). Effect of ischemic postconditioning on myocardial salvage in patients undergoing primary percutaneous coronary intervention for ST-segment elevation myocardial infarction: cardiac magnetic resonance substudy of the POST randomized trial. *International Journal of Cardiovascular Imaging* 31, 629-637. <https://doi.org/10.1007/s10554-015-0589-y>

Ladejobi, A., Wayne, M., Martin-Gill, C., Guyette, F.X., Althouse, A.D., Sharbaugh, M.S., et al. (2017). Association of remote ischemic peri-conditioning with reduced incidence of clinical heart failure after primary percutaneous coronary intervention. *Cardiovascular Revascularization Medicine*, 18, 105-109. <https://doi.org/10.1016/j.carrev.2016.12.004>

Laskey, W.K., Yoon, S., Calzada, N., & Ricciardi, M.J. (2008). Concordant improvements in coronary flow reserve and ST-segment resolution during percutaneous coronary intervention for acute myocardial infarction: a benefit of postconditioning. *Catheter Cardiovascular Intervention*, 72, 212-220. <https://doi.org/10.1002/ccd.21583>

Limalanathan, S., Andersen, G.O., Klow, N.E., Abdelnoor, M., Hoffmann, P., & Eritsland, J. (2014). Effect of ischemic postconditioning on infarct size in patients with ST-elevation myocardial infarction treated by primary PCI results of the POSTEMI (POstconditioning in ST-Elevation Myocardial Infarction) randomized trial. *J Am Heart Assoc*, 3, e000679. <https://doi.org/10.1161/JAHA.113.000679>

Liu, S.H., Huo, Y.E., Yin, B.Y., Li, X.H., & Wang, Y.F. (2013). Ischemic postconditioning may increase serum fetuin-A level in patients with acute ST-segment elevation myocardial infarction undergoing percutaneous intervention. *Clinical Laboratory*, 59, 59-64. <https://doi.org/10.7754/Clin.Lab.2012.120222>

Liu, T.K., Mishra, A.K., & Ding, F.X. (2011). Protective effect of ischemia postconditioning on reperfusion injury in patients with ST-segment elevation acute myocardial infarction. *Chinese Journal of Cardiology*, 39, 35-39. <https://doi.org/10.3760/cma.j.issn.0253-3758.2011.01.007>

Liu, Z., Zhao, L., Hong, D., & Gao, J. (2016). Remote ischaemic preconditioning reduces myocardial ischaemic reperfusion injury in patients with ST-elevation myocardial infarction undergoing primary percutaneous coronary intervention. *Acta cardiologica*, 71, 596-603. <https://doi.org/10.2143/AC.71.5.3167504>

Lonborg, J., Kelbaek, H., Vejlstrup, N., Jorgensen, E., Helqvist, S., Saunamaki, K., et al. (2010). Cardioprotective effects of ischemic postconditioning in patients treated with primary percutaneous coronary intervention, evaluated by magnetic resonance. *Circulation Cardiovascular Intervention*, 3, 34-41. <https://doi.org/10.1161/CIRCINTERVENTIONS.109.905521>

Luz, A., Santos, M., Rodrigues, P., Sousa, M.J., Anjo, D., Silveira, I., et al. (2015). Preinfarction angina: clinical significance and relationship with total ischemic time in patients with ST-elevation myocardial infarction. *Coronary Artery Disease*, 26, 22-29.

Ma, X.J., Zhang, X.H., Li, C.M., & Luo, M. (2006). Effect of postconditioning on coronary blood flow velocity and endothelial function in patients with acute myocardial infarction. *Scandinavian Cardiovascular Journal*, 40, 327-333. <https://doi.org/10.1080/14017430601047864>

Mewton, N., Thibault, H., Roubille, F., Lairez, O., Rioufol, G., Sportouch, C., et al. (2013). Postconditioning attenuates no-reflow in STEMI patients. *Basic Research in Cardiology*, 108, 383. <https://doi.org/10.1007/s00395-013-0383-8>.

Munk, K., Andersen, N.H., Schmidt, M.R., Nielsen, S.S., Terkelsen, C.J., Sloth, E., et al. (2010). Remote ischemic conditioning in patients with myocardial infarction treated with primary angioplasty: Impact on left ventricular function assessed by comprehensive echocardiography and gated single-photon emission CT. *Circulation Cardiovascular Imaging*, 3, 656-662. <https://doi.org/10.1161/CIRCIMAGING.110.957340>

Prunier, F., Angoulvant, D., Saint Etienne, C., Vermes, E., Gilard, M., Piot, C., et al. (2014). The RIPOST-MI study, assessing remote ischemic preconditioning alone or in combination with local ischemic postconditioning in ST-segment elevation myocardial infarction. *Basic Research in Cardiology*, 109, 400. <https://doi.org/10.1007/s00395-013-0400-y>

Rentoukas, I., Giannopoulos, G., Kaoukis, A., Kossyvakis, C., Raisakis, K., Driva, M., et al. (2010). Cardioprotective role of remote ischemic preconditioning in primary percutaneous coronary intervention: enhancement by opioid action. *Journal of the American College of Cardiology: Cardiovascular Intervention*, 3, 49-55. <https://doi.org/10.1016/j.jcin.2009.10.015>

Sörensson, P., Saleh, N., Bouvier, F., Bohm, F., Settergren, M., Caidahl, K., et al. (2010). Effect of postconditioning on infarct size in patients with ST elevation myocardial infarction. *Heart*, 96, 1710-1715. <https://doi.org/10.1136/hrt.2010.199430>

Staat, P., Rioufol, G., Piot, C., Cottin, Y., Cung, T.T., L'Huillier, I., et al. (2005). Postconditioning the human heart. *Circulation*, 112, 2143-2148. <https://doi.org/10.1161/CIRCULATIONAHA.105.558122>.

Tarantini, G., Favaretto, E., Marra, M.P., Frigo, A.C., Napodano, M., Cacciavillani, L., et al. (2012). Postconditioning during coronary angioplasty in acute myocardial infarction: the POST-AMI trial. *International Journal of Cardiology*, 162, 33-38. <https://doi.org/10.1016/j.ijcard.2012.03.136>

Thibault, H., Piot, C., Staat, P., Bontemps, L., Sportouch, C., Rioufol, G., et al. (2008). Long-term benefit of postconditioning. *Circulation*, 117, 1037-1044. <https://doi.org/10.1161/CIRCULATIONAHA.107.729780>.

Thuny, F., Lairez, O., Roubille, F., Mewton, N., Rioufol, G., Sportouch, C., et al. (2012). Postconditioning reduces infarct size and edema in patients with ST-segment elevation myocardial infarction. *Journal of the American College of Cardiology*, 59, 2175-2181. <https://doi.org/10.1016/j.jacc.2012.03.026>.

Traverse, J.H., Swingen, C., Henry, T.D., Fox, J., Wang, Y., Chavez, I., et al. (2019). NHLBI-sponsored trial of postconditioning during primary percutaneous coronary intervention for ST-elevation myocardial infarction. *Circulation Research*, 124, 769-778. <https://doi.org/10.1161/CIRCRESAHA.118.314060>

Ugata, Y., Nakamura, T., Taniguchi, Y., Ako, J., & Momomura, S. (2012). Effect of postconditioning in patients with ST-elevation acute myocardial infarction. *Cardiovascular Intervention and Therapeutics* 27, 14-18. <https://doi.org/10.1007/s12928-011-0077-9>

White, S.K., Froehlich, G.M., Sado, D.M., Maestrini, V., Fontana, M., Treibel, T.A., et al. (2015). Remote ischemic conditioning reduces myocardial infarct size and edema in patients with ST-segment elevation myocardial infarction. *Journal of the American College of Cardiology: Cardiovascular Intervention*, 8, 178-188. <https://doi.org/10.1016/j.jcin.2014.05.015>

Xue, F., Yang, X., Zhang, B., Zhao, C., Song, J., Jiang, T., et al. (2010). Postconditioning the human heart in percutaneous coronary intervention. *Clinical Cardiology*, 33, 439-444. <https://doi.org/10.1002/clc.20796>

Yamanaka, T., Kawai, Y., Miyoshi, T., Mima, T., Takagaki, K., Tsukuda, S., et al. (2015). Remote ischemic preconditioning reduces contrast-induced acute kidney injury in patients with ST-elevation myocardial infarction: A randomized controlled trial. *International Journal of Cardiology*, 178C, 136-141. <https://doi.org/10.1016/j.ijcard.2014.10.135>

Yang, X.C., Liu, Y., Wang, L.F., Cui, L., Wang, T., Ge, Y.G., et al. (2007). Reduction in myocardial infarct size by postconditioning in patients after percutaneous coronary intervention. *Journal of Invasive Cardiology*, 19, 424-430.

Yellon, D.M., Ackbarkhan, A.K., Balgobin, V., Bulluck, H., Deelchand, A., Dhuny, M.R., et al. (2015). Remote ischemic conditioning reduces myocardial infarct size in STEMI patients treated by thrombolysis. *Journal of the American College of Cardiology*, 65, 2764-2765. <https://doi.org/10.1016/j.jacc.2015.02.082>

Yetgin, T., Magro, M., Manintveld, O.C., Nauta, S.T., Cheng, J.M., den Uil, C.A., et al. (2014). Impact of multiple balloon inflations during primary percutaneous coronary intervention on infarct size and long-term clinical outcomes in ST-segment elevation myocardial infarction: real-world postconditioning. *Basic Research in Cardiology*, 109, 403. <https://doi.org/10.1007/s00395-014-0403-3>

Zhao, W.S., Xu, L., Wang, L.F., Zhang, L., Zhang, Z.Y., Liu, Y., et al. (2009). A 60-s postconditioning protocol by percutaneous coronary intervention inhibits myocardial apoptosis in patients with acute myocardial infarction. *Apoptosis*, 14, 1204-1211. <https://doi.org/10.1007/s10495-009-0387-x>

Zhou, F.Z., Song, W., Yin, L.H., Song, Z.F., Yang, S., Yang, F.B., et al. (2017). Effects of remote ischemic preconditioning on myocardial injury and endothelial function and prognosis after percutaneous coronary intervention in patients with acute coronary syndrome. *European Review for Medical and Pharmacological Sciences*, 21, 4642-4648.
