# Supplementary material for: Co‐morbidities and co‐medications as confounders of cardioprotection—Does it matter in the clinical setting?
Source: PubMed Central journal article supplement (PMC7680006; doi:10.1111/bph.14839), 2020-01-03
Supplement: BPH-177-5252-s003.pdf [file BPH-177-5252-s003.pdf]

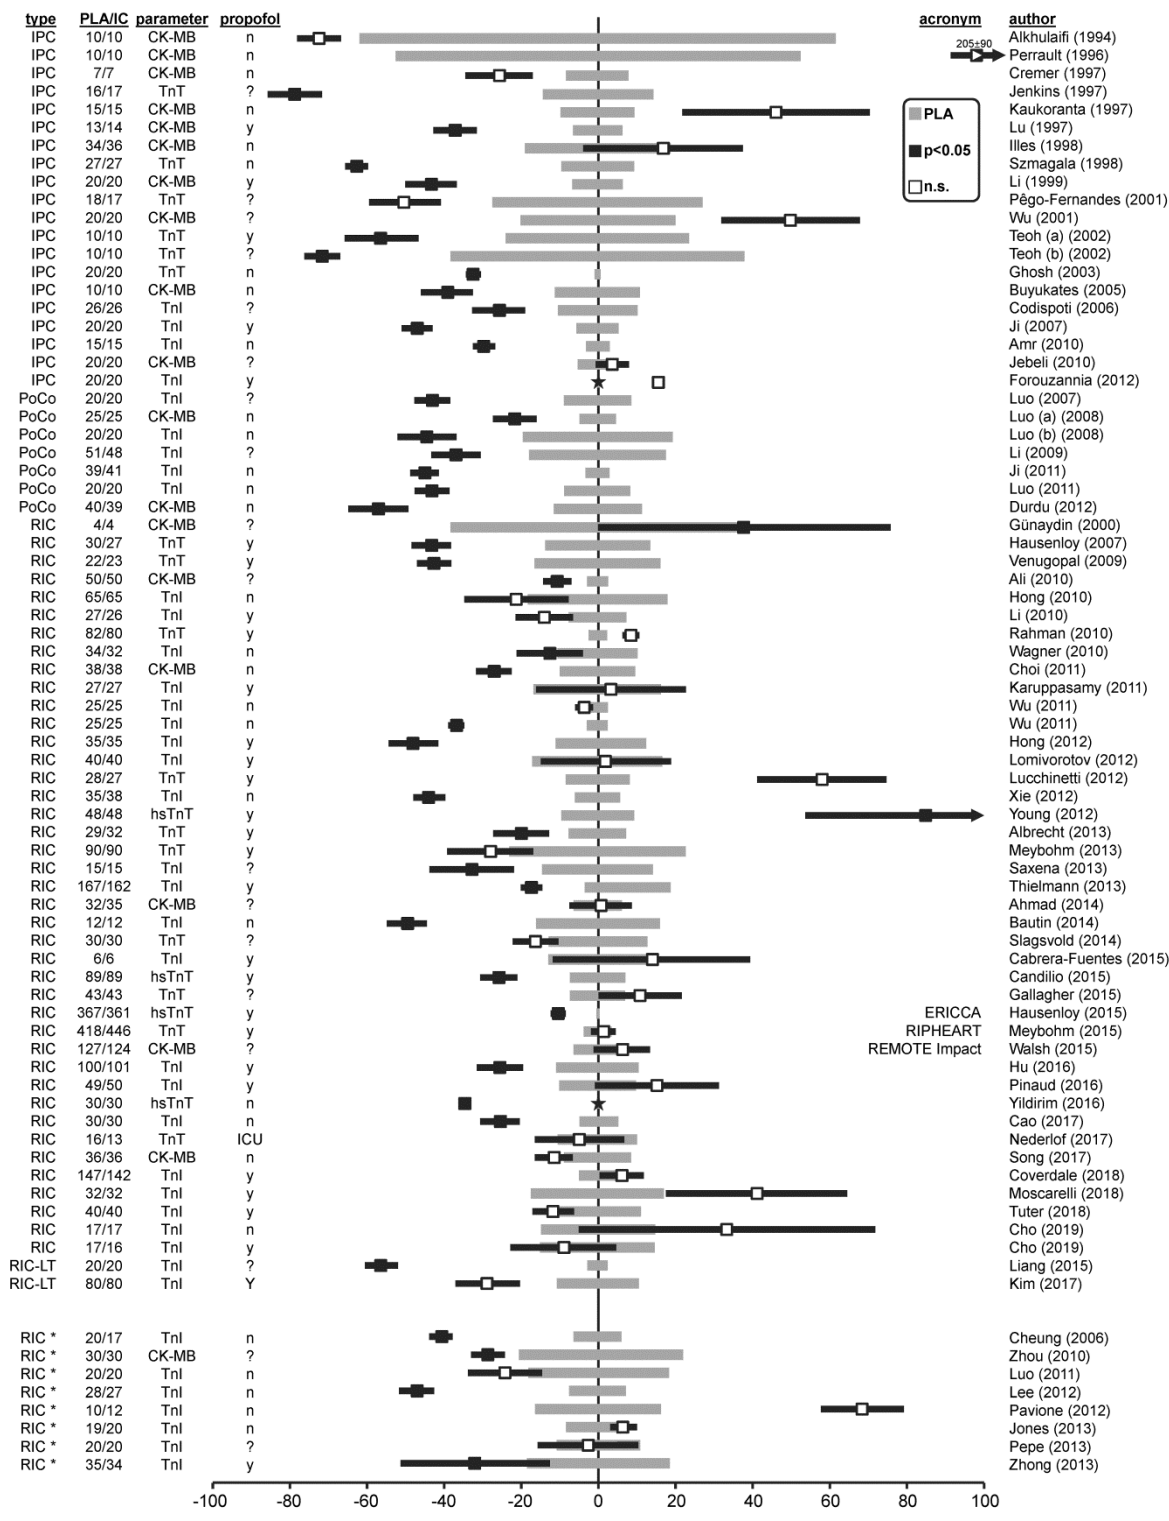

**Supplemental Figure 3:** Forest plot of clinical studies on ischaemic conditioning in patients undergoing cardiovascular surgery and with biomarker release as end-point to estimate ischaemia/reperfusion injury. The zero represents the mean value, and the gray bars represent the standard error of the mean for the placebo group. Closed squares represent significantly reduced infarct size ( $\bar{x} \pm SEM$ ), open squares represent non-significant changes. The star is used when no information was given to the standard error of the mean. CK-MB =

creatine kinase (muscle-brain); (hs)Tn(I/T) = (high sensitive) troponin (I/T); ICU = propofol was given at the intensive care unit stay; IPC = local ischaemic preconditioning; n= no propofol anaesthesia; n.s. = not significant; PLA = placebo group; PoCo = local ischaemic postconditioning; RIC = remote ischaemic conditioning; RIC\* = RIC in children undergoing cardiovascular surgery; RIC-LT = repetitive long term RIC; y = yes, propofol anaesthesia; ? = no information was given to the use of propofol

## References

Ahmad, A.M., Ali, G.S., & Tariq, W. (2014). Remote ischemic preconditioning is a safe adjuvant technique to myocardial protection but adds no clinical benefit after on-pump coronary artery bypass grafting. *Heart Surgery Forum*, 17, E220-E223. <https://doi.org/10.1532/HSF98.2014391>

Albrecht, M., Zitta, K., Bein, B., Wennemuth, G., Broch, O., Renner, J., et al. (2013). Remote ischemic preconditioning regulates HIF-1 $\alpha$  levels, apoptosis and inflammation in heart tissue of cardiosurgical patients: a pilot experimental study. *Basic Research in Cardiology*, 108, 314. <https://doi.org/10.1007/s00395-012-0314-0>

Ali, N., Rizwi, F., Iqbal, A., & Rashid, A. (2010). Induced remote ischemic pre-conditioning on ischemia-reperfusion injury in patients undergoing coronary artery bypass. *Journal of College of Physicians and Surgeons Pakistan*, 20, 427-431. <https://doi.org/10.2010/JCPSP.427431>

Alkhulaifi, A.M., Yellon, D.M., & Pugsley, W.B. (1994). Preconditioning the human heart during aorto-coronary bypass surgery. *European Journal of Cardio-Thoracic Surgery*, 8, 270-275.

Amr, Y.M., & Yassin, I.M. (2010). Cardiac protection during on-pump coronary artery bypass grafting: ischemic versus isoflurane preconditioning. *Seminars in Cardiothoracic and Vascular Anesthesia*, 14, 205-211. <https://doi.org/10.1177/1089253210376839>

Bautin, A.E., Galagudza, M.M., Datsenko, S.V., Tashkhanov, D.M., Marichev, A.O., Bakanov, A., et al. (2014). Effects of remote ischemic preconditioning on perioperative period in elective aortic valve replacement. *Anesteziol Reanimatol*, 3, 11-17.

Buyukates, M., Kalaycioglu, S., Oz, E., & Soncul, H. (2005). Effects of ischemic preconditioning in human heart. *Cardiovasc Surg*, 20, 241-245. <https://doi.org/10.1111/j.1540-8191.2005.200427.x>

Cabrera-Fuentes, H.A., Niemann, B., Grieshaber, P., Wollbrueck, M., Gehron, J., Preissner, K.T., et al. (2015). RNase1 as a potential mediator of remote ischaemic preconditioning for cardioprotection. *European Journal of Cardiothoracic Surgery* 48, 732-737. <https://doi.org/10.1093/ejcts/ezu519>

Candilio, L., Malik, A., Ariti, C., Barnard, M., Di Salvo, C., Lawrence, D., et al. (2015). Effect of remote ischaemic preconditioning on clinical outcomes in patients undergoing cardiac bypass surgery: a randomised controlled clinical trial. *Heart*, 10, 185-192. <https://doi.org/10.1136/heartjnl-2014-306178>

Cao, Z., Shen, R., Zhang, X., Cheng, G., & Yan, Z. (2017). Effects of remote ischemic preconditioning on acute myocardial injury in patients undergoing valve replacement. *Irish Journal of Medical Science*, 186, 889-893. <https://doi.org/10.1007/s11845-016-1521-8>

Cheung, M.M., Kharbanda, R.K., Konstantinov, I.E., Shimizu, M., Frndova Meng, H., Li, J., et al. (2006). Randomized controlled trial of the effects of remote ischemic preconditioning on children undergoing cardiac surgery: first clinical application in humans. *Journal of the American College of Cardiology*, 47, 2277-2282. <https://doi.org/10.1016/j.jacc.2006.01.066>

Cho, Y.J., Nam, K., Kim, T.K., Choi, S.W., Kim, S.J., Hausenloy, D.J., et al. (2019). Sevoflurane, propofol and carvedilol block myocardial protection by limb remote ischemic preconditioning. *International Journal of Cardiology*, 20, 269. <https://doi.org/10.3390/ijms20020269>

Choi, Y.S., Shim, J.K., Kim, J.C., Kang, K.S., Seo, Y.H., Ahn, K.R., et al. (2011). Effect of remote ischemic preconditioning on renal dysfunction after complex valvular heart surgery: a randomized controlled trial. *The Journal of Thoracic and Cardiovascular Surgery* 142, 148-154. <https://doi.org/10.1016/j.jtcvs.2010.11.018>

Codispoti, M., Sundaramoorthi, T., Saad, R.A., Reid, A., Sinclair, C., & Mankad, P. (2006). Optimal myocardial protection strategy for coronary artery bypass grafting without cardioplegia: prospective randomised trial. *Interactive Cardiovascular and Thoracic Surgery* 5, 217-221. <https://doi.org/10.1510/icvts.2005.116863>

Coverdale, N.S., Hamilton, A., Petsikas, D., McClure, R.S., Malik, P., Milne, B., et al. (2018). Remote ischemic preconditioning in high-risk cardiovascular surgery patients: A Randomized-controlled Trial. *Seminars in Thoracic and Cardiovascular Surgery*, 30, 26-33. <https://doi.org/10.1053/j.semtcvs.2017.09.001>

Cremer, J., Steinhoff, G., Karck, M., Ahnsell, T., Brandt, M., Teebken, O.E., et al. (1997). Ischemic preconditioning prior to myocardial protection with cold blood cardioplegia in coronary surgery. *European Journal of Cardio-Thoracic Surgery*, 12, 753-758.

Durdu, S., Sirlak, M., Cetintas, D., Inan, M.B., Eryilmaz, S., Ozcinar, E., et al. (2012). The efficacies of modified mechanical post conditioning on myocardial protection for patients undergoing coronary artery bypass grafting. *Journal Cardiothoracic Surgery*, 7, 73. <https://doi.org/10.1186/1749-8090-7-73>

Forouzannia, S.K., Abdollahi, M.H., Mirhosseini, S.J., Hadadzadeh, M., Zarepur, R., Zarepur, E., et al. (2013). Adenosine preconditioning versus ischemic preconditioning in patients undergoing off-pump coronary artery bypass (OPCAB). *The Journal of Tehran Heart Center*, 8, 127-131.

Gallagher, E.J., & LeRoith, D. (2015). Obesity and diabetes: The increased risk of cancer and cancer-related mortality. *Physiological Reviews*, 95, 727-748. <https://doi.org/10.1152/physrev.00030.2014>

Ghosh, S., & Galinanes, M. (2003). Protection of the human heart with ischemic preconditioning during cardiac surgery: role of cardiopulmonary bypass. *The Journal of Thoracic and Cardiovascular Surgery*, 126, 133-142. [https://doi.org/10.1016/S0022-5223\(02\)73293-5](https://doi.org/10.1016/S0022-5223(02)73293-5)

Günaydin, B., Cakici, I., Soncul, H., Kalaycioglu, S., Cevik, C., Sancak, B., et al. (2000). Does remote organ ischaemia trigger cardiac preconditioning during coronary artery surgery? *Pharmacological Research*, 41, 493-496. <https://doi.org/10.1006/phrs.1999.0611>

Hausenloy, D.J., Candilio, L., Evans, R., Ariti, C., Jenkins, D.P., Kolvekar, S., et al. (2015). Remote ischemic preconditioning and outcomes of cardiac surgery. *The New England Journal of Medicine*, 373, 1408-1417. <https://doi.org/10.1056/NEJMoa1413534>

Hausenloy, D.J., Mwamure, P.K., Venugopal, V., Harris, J., Barnard, M., Grundy, E., et al. (2007). Effect of remote ischaemic preconditioning on myocardial injury in patients undergoing coronary artery bypass graft surgery: a randomized controlled trial. *The Lancet*, 370, 575-579. [https://doi.org/10.1016/S0140-6736\(07\)61296-3](https://doi.org/10.1016/S0140-6736(07)61296-3)

Hong, D.M., Jeon, Y., Lee, C.S., Kim, H.J., Lee, J.M., Bahk, J.H., et al. (2012). Effects of remote ischemic preconditioning with postconditioning in patients undergoing off-pump coronary artery bypass surgery. *Circulation Journal*, 76, 884-890. <https://doi.org/10.1253/circj.CJ-11-1068>

Hong, D.M., Mint, J.J., Kim, J.H., Sohn, I.S., Lim, T.W., Lim, Y.J., et al. (2010). The effect of remote ischaemic preconditioning on myocardial injury in patients undergoing off-pump coronary artery bypass graft surgery. *Anaesthesia and Intensive Care* 38, 924-929. <https://doi.org/10.1177/0310057X1003800518>

Hu, Q., Luo, W., Huang, L., Huang, R., Chen, R., & Gao, Y. (2016). Multiorgan protection of remote ischemic preconditioning in valve replacement surgery. *The Journal of Surgical Research*, 200, 13-20. <https://doi.org/10.1016/j.jss.2015.06.053>

Illes, R.W., & Swoyer, K.D. (1998). Prospective, randomized clinical study of ischemic preconditioning as an adjunct to intermittent cold blood cardioplegia. *The Annals of Thoracic Surgery*, 65, 748-753.

Jebeli, M., Esmaili, H.R., Mandegar, M.H., Rasouli, M.R., Eghtesadi-Araghi, P., Mohammadzadeh, R., et al. (2010). Evaluation of the effects of ischemic preconditioning with a short reperfusion phase on patients undergoing a coronary artery bypass graft. *The Annals of Thoracic Surgery*, 16, 248-252.

Jenkins, D.P., Pugsley, W.B., Alkhulaifi, A.M., Kemp, M., Hooper, J., & Yellon, D.M. (1997). Ischaemic preconditioning reduces troponin T release in patients undergoing coronary artery bypass surgery. *Heart*, 77, 314-318.

Ji, B., Liu, M., Liu, J., Wang, G., Feng, W., Lu, F., et al. (2007). Evaluation by cardiac troponin I: the effect of ischemic preconditioning as an adjunct to intermittent blood cardioplegia on coronary artery bypass grafting. *Cardiovasc Surg*, 22, 394-400. <https://doi.org/10.1111/j.1540-8191.2007.00433.x>

Ji, Q., Mei, Y., Wang, X., Feng, J., Wusha, D., Cai, J., et al. (2011). Effect of ischemic postconditioning in correction of tetralogy of Fallot. *International Heart Journal* 52, 312-317. <https://doi.org/10.1536/ihj.52.312>

Jones, B.O., Pepe, S., Sheeran, F.L., Donath, S., Hardy, P., Shekerdemian, L., et al. (2013). Remote ischemic preconditioning in cyanosed neonates undergoing cardiopulmonary bypass: A randomized controlled trial. *The Journal of Thoracic and Cardiovascular Surgery*, 146, 1334-1340. <https://doi.org/10.1016/j.jtcvs.2013.01.003>

Karuppasamy, P., Chaubey, S., Dew, T., Musto, R., Sherwood, R., Desai, J., et al. (2011). Remote intermittent ischemia before coronary artery bypass graft surgery: a strategy to reduce injury and inflammation? *Basic Research in Cardiology*, 106, 511-519. <https://doi.org/10.1007/s00395-011-0185-9>

Kaukoranta, P.K., Lepojarvi, M.P., Ylitalo, K.V., Kiviluoma, K.T., & Peuhkurinen, K.J. (1997). Normothermic retrograde blood cardioplegia with or without preceding ischemic preconditioning. *The Annals of Thoracic Surgery*, 63, 1268-1274.

Kim, T.K., Min, J.J., Cho, Y.J., Hausenloy, D.J., Ahn, H., Kim, K.H., et al. (2017). Effects of delayed remote ischemic preconditioning on peri-operative myocardial injury in patients undergoing cardiac surgery - A randomized controlled trial. *International Journal of Cardiology*, 227, 511-515. <https://doi.org/10.1016/j.ijcard.2016.10.111>

Lee, J.H., Park, Y.H., Byon, H.J., Kim, H.S., Kim, C.S., & Kim, J.T. (2012). Effect of remote ischaemic preconditioning on ischaemic-reperfusion injury in pulmonary hypertensive infants receiving ventricular septal defect repair. *British Journal of Anaesthesiology*, 108, 223-228. <https://doi.org/10.1093/bja/aer388>

Li, B., Chen, R., Huang, R., & Luo, W. (2009). Clinical benefit of cardiac ischemic postconditioning in corrections of tetralogy of Fallot. *Interactive Cardiovascular and Thoracic Surgery*, 8, 17-21. <https://doi.org/10.1510/icvts.2008.189373>

Li, G., Chen, S., Lu, E., & Li, Y. (1999). Ischemic preconditioning improves preservation with cold blood cardioplegia in valve replacement patients. *European Journal of Cardio-Thoracic Surgery*, 15, 653-657.

Li, L., Luo, W., Huang, L., Zhang, W., Gao, Y., Jiang, H., et al. (2010). Remote preconditioning reduces myocardial injury in adult valve replacement: a randomized controlled trial. *The Journal of Surgical Research*, 164, e21-e26. <https://doi.org/10.1016/j.jss.2010.06.016>

Liang, Y., Li, Y.P., He, F., Liu, X.Q., & Zhang, J.Y. (2015). Long-term, regular remote ischemic preconditioning improves endothelial function in patients with coronary heart disease. *Brazilian Journal of Medical and Biological Research*, 48, 568-576. <https://doi.org/10.1590/1414-431X20144452>

Lomivorotov, V.V., Shmyrev, V.A., Nepomnyaschih, V.A., Ponomarev, D.N., Knyazkova, L.G., Lomivorotov, V.N., et al. (2012). Remote ischaemic preconditioning does not protect the heart in patients undergoing coronary artery bypass grafting. *Interactive Cardiovascular and Thoracic Surgery*, 15, 18-22. <https://doi.org/10.1093/icvts/ivs118>

Lu, E.-X., Chen, S.-X., Yuan, M.-D., Hu, T.-H., Zhou, H.-C., Luo, W.-J., et al. (1997). Preconditioning improves myocardial preservation in patients undergoing open heart operations. *The Annals of Thoracic Surgery*, 64, 1320-1324.

Lucchinetti, E., Bestmann, L., Feng, J., Freidank, H., Clanachan, A.S., Finegan, B.A., et al. (2012). Remote ischemic preconditioning applied during isoflurane inhalation provides no benefit to the myocardium of patients undergoing on-pump coronary artery bypass graft surgery: Lack of synergy or evidence of antagonism in cardioprotection? *Anesthesiology*, 116, 296-310. <https://doi.org/10.1097/ALN.0b013e318242349a>

Luo, W., Li, B., Chen, R., Huang, R., & Lin, G. (2008a). Effect of ischemic postconditioning in adult valve replacement. *European Journal of Cardio-Thoracic Surgery*, 33, 203-208. <https://doi.org/10.1016/j.ejcts.2007.11.010>

Luo, W., Li, B., Lin, G., Chen, R., & Huang, R. (2008b). Does cardioplegia leave room for postconditioning in paediatric cardiac surgery? *Cardiology in the Young* 18, 282-287. <https://doi.org/10.1017/S1047951108002072>

Luo, W., Li, B., Lin, G., & Huang, R. (2007). Postconditioning in cardiac surgery for tetralogy of Fallot. *Cardiovasc Surg*, 133, 1373-1374. <https://doi.org/10.1016/j.jtcvs.2007.01.028>

Luo, W., Zhu, M., Huang, R., & Zhang, Y. (2011). A comparison of cardiac post-conditioning and remote pre-conditioning in paediatric cardiac surgery. *Cardiology in the Young*, 21, 266-270. <https://doi.org/10.1017/S1047951110001915>

Meybohm, P., Bein, B., Brosteanu, O., Cremer, J., Gruenewald, M., Stoppe, C., et al. (2015). A multicenter trial of remote ischemic preconditioning for heart surgery. *The New England Journal of Medicine*, 373, 1397-1407. <https://doi.org/10.1056/NEJMoa1413579>

Meybohm, P., Renner, J., Broch, O., Caliebe, D., Albrecht, M., Cremer, J., et al. (2013). Postoperative neurocognitive dysfunction in patients undergoing cardiac surgery after remote ischemic preconditioning: a double-blind randomized controlled pilot study. *PLoS One*, 8, e64743.

Moscarelli, M., Fiorentino, F., Suleiman, M.S., Emanuelli, C., Reeves, B.C., Punjabi, P.P., et al. (2018). Remote ischaemic preconditioning in isolated aortic valve and coronary artery bypass surgery: a randomized trial. *European Journal of Cardiothoracic Surgery* <https://doi.org/10.1093/ejcts/ezy404>

Nederlof, R., Weber, N.C., Juffermans, N.P., de Mol, B.A., Hollmann, M.W., Preckel, B., et al. (2017). A randomized trial of remote ischemic preconditioning and control treatment for cardioprotection in sevoflurane-anesthetized CABG patients. *BioMedical Central Journal Anesthesiology*, 17, 51. <https://doi.org/10.1186/s12871-017-0330-6>

Pavione, M.A., Carmona, F., de, C.M., & Carlotti, A.P. (2012). Late remote ischemic preconditioning in children undergoing cardiopulmonary bypass: A randomized controlled trial. *The Journal of Thoracic and Cardiovascular Surgery*, 144, 178-183. <https://doi.org/10.1016/j.jtcvs.2011.12.029>

Pego-Fernandes, P.M., Jatene, F.B., Kwasnicka, K., Hueb, A.C., Moreira, L.F., Gentil, A.F., et al. (2000). Ischemic preconditioning in myocardial revascularization with intermittent aortic cross-clamping. *Cardiovascular Surgery*, 15, 333-338. <https://doi.org/10.1111/j.1540-8191.2000.tb00467.x>

Pepe, S., Liaw, N.Y., Hepponstall, M., Sheeran, F.L., Yong, M.S., d'Udekem, Y., et al. (2013). Effect of remote ischemic preconditioning on phosphorylated protein signaling in children undergoing tetralogy of fallot repair: a randomized controlled trial. *Journal of the American Heart Association*, 2, e000095. <https://doi.org/10.1161/JAHA.113.000095>

Perrault, L.P., Menasche, P., Bel, A., de Chaumaray, T., Peynet, J., Mondry, A., et al. (1996). Ischemic preconditioning in cardiac surgery: a word of caution. *The Journal of Thoracic and Cardiovascular Surgery*, 112, 1378-1386.

Pinaud, F., Corbeau, J.J., Baufreton, C., Binuani, J.P., De Brux, J.L., Fouquet, O., et al. (2016). Remote ischemic preconditioning in aortic valve surgery: Results of a randomized controlled study. *Journal of Cardiology*, 67, 36-41. <https://doi.org/10.1016/j.jcc.2015.06.007>



Rahman, I.A., Mascaro, J.G., Steeds, R.P., Frenneaux, M.P., Nightingale, P., Gosling, P., et al. (2010). Remote ischemic preconditioning in human coronary artery bypass surgery: from promise to disappointment? *Circulation*, 122, S53-S59. <https://doi.org/10.1161/CIRCULATIONAHA.109.926667>

Saxena, P., Aggarwal, S., Misso, N.L., Passage, J., Newman, M.A., Thompson, P.J., et al. (2013). Remote ischaemic preconditioning down-regulates kinin receptor expression in neutrophils of patients undergoing heart surgery. *Interactive Cardiovascular and Thoracic Surgery*, 17, 653-658. <https://doi.org/10.1093/icvts/ivt279>

Slagsvold, K.H., Rognmo, O., Hoydal, M., Wisloff, U., & Wahba, A. (2014). Remote ischemic preconditioning preserves mitochondrial function and influences myocardial microRNA expression in atrial myocardium during coronary bypass surgery. *Circulation Research*, 114, 851-859. <https://doi.org/10.1161/CIRCRESAHA.114.302751>

Song, Y., Song, J.W., Lee, S., Jun, J.H., Kwak, Y.L., & Shim, J.K. (2017). Effects of remote ischemic preconditioning in patients with concentric myocardial hypertrophy: A randomized, controlled trial with molecular insights. *International Journal of Cardiology*, 249, 36-41. <https://doi.org/10.1016/j.ijcard.2017.08.073>

Szmagala, P., Morawski, W., Krejca, M., Gburek, T., & Bochenek, A. (1998). Evaluation of perioperative myocardial tissue damage in ischemically preconditioned human heart during aorto coronary bypass surgery. *Cardiovascular Surgery*, 39, 791-795.

Teoh, L.K., Grant, R., Hulf, J.A., Pugsley, W.B., & Yellon, D.M. (2002). A comparison between ischemic preconditioning, intermittent cross-clamp fibrillation and cold crystalloid cardioplegia for myocardial protection during coronary artery bypass graft surgery. *Cardiovascular Surgery*, 10, 251-255. [https://doi.org/10.1016/S0967-2109\(02\)00007-8](https://doi.org/10.1016/S0967-2109(02)00007-8)

Thielmann, M., Kottenberg, E., Kleinbongard, P., Wendt, D., Gedik, N., Pasa, S., et al. (2013). Cardioprotective and prognostic effects of remote ischaemic preconditioning in patients undergoing coronary artery bypass surgery: a single-centre randomised, double-blind, controlled trial. *The Lancet*, 382, 597-604. [https://doi.org/10.1016/S0140-6736\(13\)61450-6](https://doi.org/10.1016/S0140-6736(13)61450-6)

Tuter, D.S., Kopylov, P.Y., Syrkin, A.L., Glazachev, O.S., Komarov, R.N., Katkov, A.I., et al. (2018). Intermittent systemic hypoxic-hyperoxic training for myocardial protection in patients

undergoing coronary artery bypass surgery: first results from a single-centre, randomised controlled trial. *Open Heart*, 5, e000891. <https://doi.org/10.1136/openhrt-2018-000891>

Venugopal, V., Hausenloy, D.J., Ludman, A., Di Salvo, C., Kolvekar, S., Yap, J., et al. (2009). Remote ischaemic preconditioning reduces myocardial injury in patients undergoing cardiac surgery with cold blood cardioplegia: a randomised controlled trial. *Heart*, 95, 1567-1571. <https://doi.org/10.1136/hrt.2008.155770>

Wagner, R., Piler, P., Bedanova, H., Adamek, P., Grodecka, L., & Freiburger, T. (2010). Myocardial injury is decreased by late remote ischaemic preconditioning and aggravated by tramadol in patients undergoing cardiac surgery: a randomised controlled trial. *Interactive Cardiovascular and Thoracic Surgery*, 11, 758-762. <https://doi.org/10.1510/icvts.2010.243600>

Walsh, M., Whitlock, R., Garg, A.X., Legare, J.F., Duncan, A.E., Zimmerman, R., et al. (2015). Effects of remote ischemic preconditioning in high-risk patients undergoing cardiac surgery (Remote IMPACT): a randomized controlled trial. *Canadian Medical Association Journal* 188, 329-336. <https://doi.org/10.1503/cmaj.150632>

Wu, Q., Gui, P., Wu, J., Ding, D., Purusram, G., Dong, N., et al. (2011). Effect of limb ischemic preconditioning on myocardial injury in patients undergoing mitral valve replacement surgery. A randomized controlled trial. *Circulation Journal*, 75, 1885-1889. <https://doi.org/10.1253/circj.CJ-10-1130>

Wu, Z.K., Pehkonen, E., Laurikka, J., Kaukinen, L., Honkonen, E.L., Kaukinen, S., et al. (2001). The protective effects of preconditioning decline in aged patients undergoing coronary artery bypass grafting. *The Journal of Thoracic and Cardiovascular Surgery*, 122, 972-978. <https://doi.org/10.1067/mtc.2001.117279>

Xie, J.J., Liao, X.L., Chen, W.G., Huang, D.D., Chang, F.J., Chen, W., et al. (2012). Remote ischaemic preconditioning reduces myocardial injury in patients undergoing heart valve surgery: randomised controlled trial. *Heart*, 98, 384-388. <https://doi.org/10.1136/heartjnl-2011-300860>

Yildirim, F., Iskesen, I., Kurdal, A.T., Ozturk, T., Taneli, F., Gozukara, C., et al. (2016). Is "Attenuation of Oxidative Stress" helpful to understand the mechanism of remote ischemic preconditioning in cardiac surgery? *Journal of Cardiothoracic and Vascular Anesthesia*, 30, 134-140. <https://doi.org/10.1053/j.jvca.2015.06.027>

Young, P.J., Dalley, P., Garden, A., Horrocks, C., La, F.A., Mahon, B., et al. (2012). A pilot study investigating the effects of remote ischemic preconditioning in high-risk cardiac surgery using a randomised controlled double-blind protocol. *Basic Research in Cardiology*, 107, 256. <https://doi.org/10.1007/s00395-012-0256-6>

Zhong, H., Gao, Z., Chen, M., Zhao, J., Wang, F., Li, L., et al. (2013). Cardioprotective effect of remote ischemic postconditioning on children undergoing cardiac surgery: a randomized controlled trial. *Paediatric Anaesthesia*, 23, 726-733. <https://doi.org/10.1111/pan.12181>

Zhou, W., Zeng, D., Chen, R., Liu, J., Yang, G., Liu, P., et al. (2010). Limb ischemic preconditioning reduces heart and lung injury after an open heart operation in infants. *Pediatric Cardiology*, 31, 22-29. <https://doi.org/10.1007/s00246-009-9536-9>
